# Supplementary material
Source: HighWire-hosted journal article supplement (https://gh.bmj.com/content/4/6/e001794)
Supplement: inline-supplementary-material-1 [file inline-supplementary-material-1.pdf]

**PubMed search strategy using the Llt.search tool**<sup>35</sup>

(((((australia[mh] OR australia\*[tiab]) AND (oceanic ancestry group[mh] OR aborigin\*[tiab] OR indigenous[tw])) OR (torres strait\* islander\*[tiab])) AND medline[sb]) OR (((au[ad] OR australia\*[ad] OR australia\*[tiab] OR northern territory[tiab] OR northern territory[ad] OR tasmania[tiab] OR tasmania[ad] OR new south wales[tiab] OR new south wales[ad] OR victoria[tiab] OR victoria[ad] OR queensland[tiab] OR queensland[ad]) AND (aborigin\*[tiab] OR indigenous[tiab])) OR (torres strait\* islander\*[tiab])) NOT medline[sb]) AND English[la]) AND (tubercul\*))
